# Supplementary material for: TiO2/Ti3C2 intercalated with g-C3N4 nanosheets as 3D/2D ternary heterojunctions photocatalyst for the enhanced photocatalytic reduction of nitrate with high N2 selectivity in aqueous solution
Source: Royal Society of Chemistry journal article supplement (doi:10.1039/d1qi00001b), 2021-01-01
Supplement: d1qi00001b1.pdf [file d1qi00001b1.pdf]

## Supporting Information

### **TiO<sub>2</sub>/Ti<sub>3</sub>C<sub>2</sub> intercalated with g-C<sub>3</sub>N<sub>4</sub> nanosheets as 3D/2D ternary heterojunctions photocatalyst for enhanced photocatalytic reduction of nitrate with high N<sub>2</sub> selectivity in aqueous solution**

Rui Zheng, Chunhu Li,\* Kelei Huang, Ying Guan, Bo Sun, Wentai Wang, Liang Wang,

Junjie Bian

Key Laboratory of Marine Chemistry Theory and Technology, Ministry of Education,  
College of Chemistry and Chemical Engineering. Ocean University of China, Qingdao  
266100, Shandong, China. E-mail: [lichunhu@ouc.edu.cn](mailto:lichunhu@ouc.edu.cn); Telephone/Fax: +86-532-  
66781527.

## **S1. Experimental section**

### **Materials**

The  $\text{Ti}_3\text{AlC}_2$  powder was produced by Beijing Forsman Technology Co., Ltd. 49 % HF aqueous solution was produced by Sinopharm Chemical Reagent Co., Ltd. Urea,  $\text{KNO}_3$  and Rhodamine B (RhB) were purchased from Sinopharm Chemical Reagent Co., Ltd (China). Formic acid aqueous solution was obtained from Tianjin Fuchen Chemical Reagent Factory. Nitrogen ( $\text{N}_2$ , 99.99 %) was supplied by Qingdao Heli Gas Co., Ltd. All solvent used in this study was deionized (DI) water, which generated by the instrument of SW AC-520, Japan. All materials were used directly without further treatment.

### **Characterizations**

The typical morphology and microstructure of the composites were observed by a scanning electron microscope (SEM, Hitachi S4800 and JSM-6510LV) and a transmission electronic microscopy (TEM, FET Tecnai G2 F20). X-ray diffraction (XRD) patterns were characterized by an X-ray diffractometer (D8 ADVANCE, Bruker). Fourier transform infrared spectroscopy (FTIR, Nicolet Nexus 670) were obtained to study the chemical structure of samples. X-ray photoelectron spectra (XPS, Escalab 250xi, Thermo Scientific) were obtained to reveal the situation of the surface chemical state and composition of photocatalysts. The information of Brunauer-Emmett-Teller (BET) specific surface areas ( $S_{\text{BET}}$ ) of the materials was obtained by nitrogen adsorption apparatus (ASAP2020, Micromeritics). The corresponding pore size distribution curves were characterized by the Barret-Joyner-Halender (BJH) method. The UV-vis diffused

reflectance spectra (DRS) of the samples were described by UV-vis spectrophotometer (UV2550, Shimadzu).

Transient photocurrent responses (TPR), electrochemical impedance spectroscopy (EIS), and Mott-Schottky (M-S) plots were characterized by electrochemical workstation (CHI760e Instruments). The prepared samples, Ag/AgCl electrode and platinum-wire electrode were taken as the working electrodes, reference electrode and counter electrode, respectively. In the process of electrochemical measurements, the slurry of photocatalysts were coated onto the indium tin oxide (ITO) conductive glasses to effect as the working electrodes. During the experiments of TPR, the 300 W Xenon lamp was used as the light source. The M-S plots were tested at the frequency varying from 1000 to 2000 Hz.

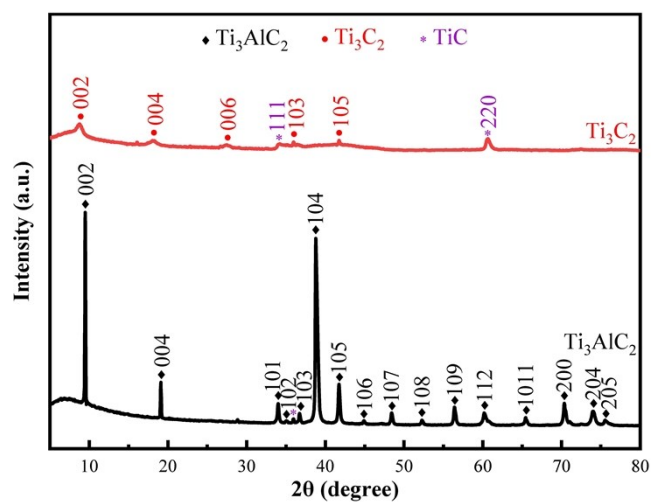

**Fig. S1.** XRD patterns of  $\text{Ti}_3\text{AlC}_2$  and  $\text{Ti}_3\text{C}_2$ .

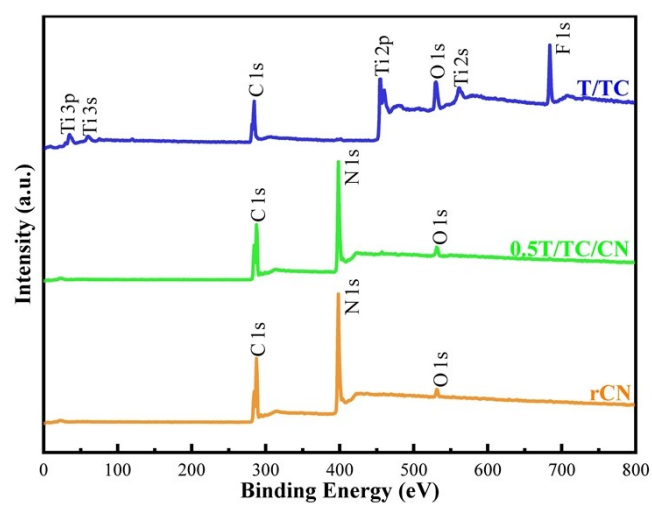

**Fig. S2.** XPS survey spectra of rCN, T/TC and 0.5T/TC/CN samples.

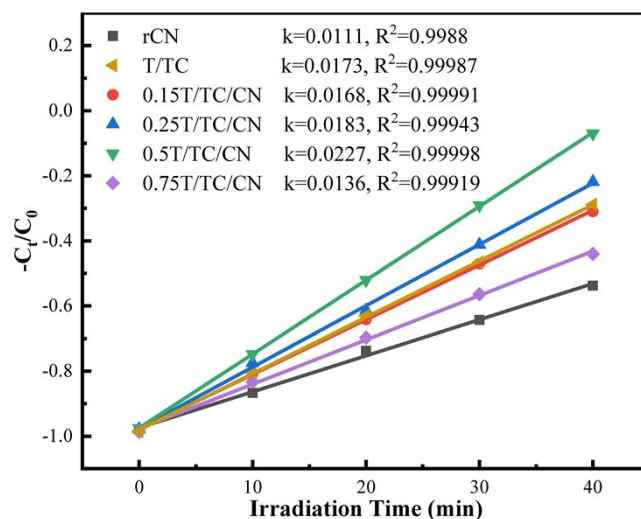

**Fig. S3.** Kinetic fit for the photocatalytic reduction of nitrate with different photocatalysts.

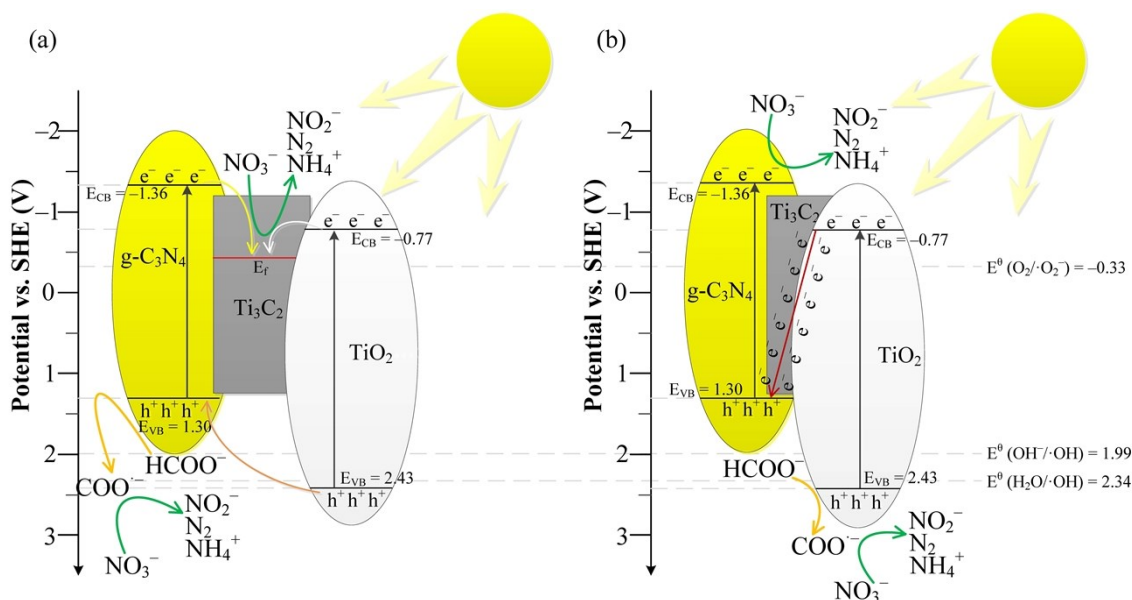

**Fig. S4.** The possible mechanisms for photocatalytic reduction of nitrate and charge transfer pathways over 0.5T/TC/CN: II-scheme heterojunction (a) and Z-scheme heterojunction (b).

**Table S1.** Photocatalytic reduction of nitrate in previous literatures.

| Photocatalysts                                        | $[\text{NO}_3^--\text{N}]_0$<br>/( $\text{mg}_\text{N}\cdot\text{L}^{-1}$ ) | Hole scavenger | Conversion<br>(%) | Irradiation<br>time/(min) | Selectivity (%)          |                          |              | Ref. |
|-------------------------------------------------------|-----------------------------------------------------------------------------|----------------|-------------------|---------------------------|--------------------------|--------------------------|--------------|------|
|                                                       |                                                                             |                |                   |                           | $\text{NO}_2^--\text{N}$ | $\text{NH}_4^+-\text{N}$ | $\text{N}_2$ |      |
| $\text{Mn}_2\text{O}_3/\text{g}-\text{C}_3\text{N}_4$ | 20                                                                          | Magnetic field | 94.5              | 120                       | -                        | -                        | 93.2         | 1    |
| $\text{Pd}/\text{GdCrO}_3$                            | 8.4                                                                         | Formic acid    | 98.7              | 100                       | 0                        | 0                        | 100          | 2    |
| $\text{AgCl}/\text{TNT}$                              | 8.4                                                                         | Formic acid    | 94.5              | 30                        | 0.2                      | 7.1                      | 92.9         | 3    |
| $\text{TiO}_2(\text{P90})$                            | 100                                                                         | Formic acid    | >88               | -                         | -                        | -                        | >94          | 4    |
| $\text{Ag}/\text{TiO}_2(25)$                          | 100                                                                         | Formic acid    | 71.7              | 30                        | 11.5                     | 0.167                    | 83.7         | 5    |
| $\text{TiO}_2(\text{P25})$                            | 11.2                                                                        | Formic acid    | 52.5              | 120                       | 23                       | 6                        | 38.1         | 6    |
| $\text{Pt}-\text{Cu}/\text{TiO}_2$                    | 14                                                                          | Benzene        | 63.3              | 240                       | 1                        | 1                        | 90           | 7    |

| Photocatalysts                                             | $[\text{NO}_3^--\text{N}]_0$<br>/( $\text{mg}_\text{N}\cdot\text{L}^{-1}$ ) | Hole scavenger                              | Conversion<br>(%) | Irradiation<br>time/(min) | Selectivity (%)          |                          |              | Ref. |
|------------------------------------------------------------|-----------------------------------------------------------------------------|---------------------------------------------|-------------------|---------------------------|--------------------------|--------------------------|--------------|------|
|                                                            |                                                                             |                                             |                   |                           | $\text{NO}_2^--\text{N}$ | $\text{NH}_4^+-\text{N}$ | $\text{N}_2$ |      |
| <b>TiO<sub>2</sub>(P25)</b>                                | 3.5                                                                         | Bio-electrons                               | 60                | 1440                      | 0                        | 4                        | 96           | 8    |
| <b>Cu/TiO<sub>2</sub>(P25)</b>                             | 10                                                                          | Glycerol                                    | 98                | 120                       | 0                        | 2                        | 98           | 9    |
| <b>Cu/TiO<sub>2</sub></b>                                  | 8.4                                                                         | Formic acid                                 | 93.73             | 120                       | -                        | -                        | 0            | 10   |
| <b>Cu<sub>2</sub>O/TiO<sub>2</sub>(P25)</b>                | 22.4                                                                        | Oxalic acid                                 | 57.6              | 180                       | 12.4                     | 45.7                     | 41.9         | 11   |
| <b>Pt/TiO<sub>2</sub>+SnPd/Al<sub>2</sub>O<sub>3</sub></b> | 14                                                                          | Glucose                                     | 23                | 720                       | 3                        | 22                       | 75           | 12   |
| <b>Ag/TiO<sub>2</sub>(P25)</b>                             | 100                                                                         | Formic acid                                 | 100               | 180                       | 0                        | 4                        | 96           | 13   |
| <b>Ag/TiO<sub>2</sub>(P25)</b>                             | 100                                                                         | Formic acid                                 | 99.6              | 240                       | 2.3                      | 9.3                      | 88.4         | 14   |
| <b>Pd-Cu/TiO<sub>2</sub>(P25)</b>                          | 22.4                                                                        | CO <sub>2</sub> +H <sub>2</sub> +Humic acid | 100               | 240                       | 0                        | <2                       | > 98         | 15   |
| <b>Pd-Cu/TiO<sub>2</sub>(P25)</b>                          | 11.2                                                                        | H <sub>2</sub> +Formic acid                 | 39-100            | 60                        | 0                        | 0-13.7                   | 86.3-        | 16   |

| Photocatalysts                  | $[\text{NO}_3^--\text{N}]_0$<br>/( $\text{mg}_\text{N}\cdot\text{L}^{-1}$ ) | Hole scavenger | Conversion<br>(%) | Irradiation<br>time/(min) | Selectivity (%)          |                          |              | Ref. |
|---------------------------------|-----------------------------------------------------------------------------|----------------|-------------------|---------------------------|--------------------------|--------------------------|--------------|------|
|                                 |                                                                             |                |                   |                           | $\text{NO}_2^--\text{N}$ | $\text{NH}_4^+-\text{N}$ | $\text{N}_2$ |      |
|                                 |                                                                             |                |                   |                           |                          |                          | 100          |      |
| Sn-Pd/Pt/TiO <sub>2</sub> (P25) | 140                                                                         | Ethanol        | 23                | 240                       | 0                        | 24                       | 76           | 17   |

**Table S2.** Texture properties of the prepared photocatalysts.

| Photocatalysts | $S_{\text{BET}}$ ( $\text{m}^2\cdot\text{g}^{-1}$ ) | $V_{\text{pore}}$ ( $\text{cm}^3\cdot\text{g}^{-1}$ ) | $D_{\text{pore}}$ (nm) |
|----------------|-----------------------------------------------------|-------------------------------------------------------|------------------------|
| rCN            | 90.4175                                             | 0.486570                                              | 21.52549               |
| T/TC           | 7.6879                                              | 0.034164                                              | 17.77535               |
| 0.5T/TC/CN     | 30.1255                                             | 0.166963                                              | 22.16890               |

**Table S3.** Performance of photocatalytic nitrate reduction over different photocatalysts..

| Photocatalysts | Conversion of<br>$\text{NO}_3^-$ -N (%) | Yield of $\text{NO}_2^-$<br>-N ( $\text{mg}_\text{N}\cdot\text{L}^{-1}$ ) | Yield of $\text{NH}_4^+$ -<br>N ( $\text{mg}_\text{N}\cdot\text{L}^{-1}$ ) | Selectivity of<br>$\text{N}_2$ (%) |
|----------------|-----------------------------------------|---------------------------------------------------------------------------|----------------------------------------------------------------------------|------------------------------------|
| rCN            | 46.23                                   | 4.04                                                                      | 2.91                                                                       | 84.99                              |
| T/TC           | 71.13                                   | 1.08                                                                      | 2.70                                                                       | 94.67                              |
| 0.15T/TC/CN    | 69.00                                   | 2.46                                                                      | 2.70                                                                       | 92.30                              |
| 0.25T/TC/CN    | 78.13                                   | 1.11                                                                      | 6.04                                                                       | 90.51                              |
| 0.5T/TC/CN     | 93.03                                   | 0.56                                                                      | 3.21                                                                       | 96.62                              |
| 0.75T/TC/CN    | 55.99                                   | 3.6                                                                       | 2.32                                                                       | 88.77                              |

## Reference

1. J. Zhao, N. Li, R. Yu, Z. Zhao and J. Nan, Magnetic field enhanced denitrification in nitrate and ammonia contaminated water under 3D/2D Mn<sub>2</sub>O<sub>3</sub>/g-C<sub>3</sub>N<sub>4</sub> photocatalysis, *Chem. Eng. J.*, 2018, **349**, 530-538.
2. Z. Hou, F. Chen, J. Wang, C. P. François-Xavier and T. Wintgens, Novel Pd/GdCrO<sub>3</sub> composite for photo-catalytic reduction of nitrate to N<sub>2</sub> with high selectivity and activity, *Appl. Catal. B-Environ.*, 2018, **232**, 124-134.
3. Z. Geng, Z. Chen, Z. Li, X. Qi, X. Yang, W. Fan, Y. Guo, L. Zhang and M. Huo, Enhanced photocatalytic conversion and selectivity of nitrate reduction to nitrogen over AgCl/TiO<sub>2</sub> nanotubes, *Dalton T.*, 2018, **47**, 11104-11112.
4. H. O. N. Tugaoen, P. Herckes, K. Hristovski and P. Westerhoff, Influence of ultraviolet wavelengths on kinetics and selectivity for N-gases during TiO<sub>2</sub> photocatalytic reduction of nitrate, *Appl. Catal. B-Environ.*, 2018, **220**, 597-606.
5. F. Zhang, R. Jin, J. Chen, C. Shao, W. Gao, L. Li and N. Guan, High photocatalytic activity and selectivity for nitrogen in nitrate reduction on Ag/TiO<sub>2</sub> catalyst with fine silver clusters, *J. Catal.*, 2005, **232**, 424-431.
6. G. Liu, S. You, M. Ma, H. Huang and N. Ren, Removal of nitrate by photocatalytic denitrification using nonlinear optical material, *Environ. Sci. Technol.*, 2016, **50**, 11218-11225.

7. L. Li, Z. Xu, F. Liu, Y. Shao, J. Wang, H. Wan and S. Zheng, Photocatalytic nitrate reduction over Pt–Cu/TiO<sub>2</sub> catalysts with benzene as hole scavenger, *J. Photoch. Photobio. A*, 2010, **212**, 113-121.
8. Z.-Q. Lin, S.-J. Yuan, W.-W. Li, J.-J. Chen, G.-P. Sheng and H.-Q. Yu, Denitrification in an integrated bioelectro-photocatalytic system, *Water Res.*, 2017, **109**, 88-93.
9. R. Lucchetti, L. Onotri, L. Clarizia, F. D. Natale, I. D. Somma, R. Andreozzi and R. Marotta, Removal of nitrate and simultaneous hydrogen generation through photocatalytic reforming of glycerol over “in situ” prepared zero-valent nano copper/P25, *Appl. Catal. B-Environ.*, 2017, **202**, 539-549.
10. D. d. B. Luiz, S. L. F. Andersen, C. Berger, H. J. José and R. d. F. P. M. Moreira, Photocatalytic reduction of nitrate ions in water over metal-modified TiO<sub>2</sub>, *J. Photoch. Photobio. A*, 2012, **246**, 36-44.
11. H. Adamu, A. J. McCue, R. S. F. Taylor, H. G. Manyar and J. A. Anderson, Simultaneous photocatalytic removal of nitrate and oxalic acid over Cu<sub>2</sub>O/TiO<sub>2</sub> and Cu<sub>2</sub>O/TiO<sub>2</sub>-AC composites, *Appl. Catal. B-Environ.*, 2017, **217**, 181-191.
12. J. Hirayama and Y. Kamiya, Combining the photocatalyst Pt/TiO<sub>2</sub> and the nonphotocatalyst SnPd/Al<sub>2</sub>O<sub>3</sub> for effective photocatalytic purification of groundwater polluted with nitrate, *ACS Catal.*, 2014, **4**, 2207-2215.
13. J. Sá, C. A. Agüera, S. Gross and J. A. Anderson, Photocatalytic nitrate reduction over metal modified TiO<sub>2</sub>, *Appl. Catal. B-Environ.*, 2009, **85**, 192-200.

14. H.-T. Ren, S.-Y. Jia, J.-J. Zou, S.-H. Wu and X. Han, A facile preparation of Ag<sub>2</sub>O/P25 photocatalyst for selective reduction of nitrate, *Appl. Catal. B-Environ.*, 2015, **176-177**, 53-61.
15. O. S. G. P. Soares, M. F. R. Pereira, J. J. M. Órfão, J. L. Faria and C. G. Silva, Photocatalytic nitrate reduction over Pd–Cu/TiO<sub>2</sub>, *Chem. Eng. J.*, 2014, **251**, 123-130.
16. N. Wehbe, M. Jaafar, C. Guillard, J.-M. Herrmann, S. Miachon, E. Puzenat and N. Guilhaume, Comparative study of photocatalytic and non-photocatalytic reduction of nitrates in water, *Appl. Catal. A-Gen.*, 2009, **368**, 1-8.
17. J. Hirayama, H. Kondo, Y.-k. Miura, R. Abe and Y. Kamiya, Highly effective photocatalytic system comprising semiconductor photocatalyst and supported bimetallic non-photocatalyst for selective reduction of nitrate to nitrogen in water, *Catal. Commun.*, 2012, **20**, 99-102.
